# Supplementary material for: Effects of flavoring compounds used in electronic cigarette refill liquids on endothelial and vascular function
Source: PLOS journal article supplement (doi:10.1371/journal.pone.0222152), 2019-09-09
Supplement: S5 (10.1371/journal.pone.0222152.s005) [file journal.pone.0222152.s005]

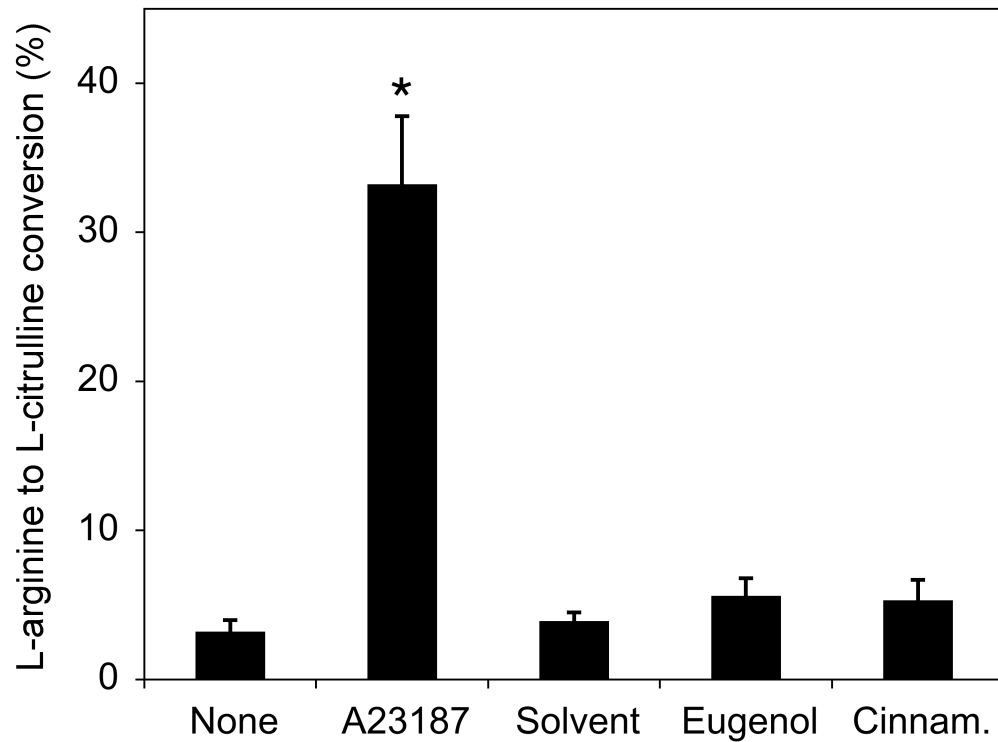

**S1 Fig. Lack of direct effects of eugenol and cinnamaldehyde on endothelial L-citrulline formation.** Endothelial cells were incubated for 10 min with 1  $\mu$ M A23187, 1 mM eugenol, 1 mM cinnamaldehyde or 0.1% DMSO (solvent). Conversion of L-[ $^3$ H]arginine into L-[ $^3$ H]citrulline was determined as described in the Materials and methods section of the main text. Data are mean values  $\pm$  SEM (n=3). \*p<0.05 vs. control as determined by ANOVA and Dunnett's post hoc test.
