# Supplementary material for: Effects of flavoring compounds used in electronic cigarette refill liquids on endothelial and vascular function
Source: PLOS journal article supplement (doi:10.1371/journal.pone.0222152), 2019-09-09
Supplement: S6 (10.1371/journal.pone.0222152.s006) [file journal.pone.0222152.s006]

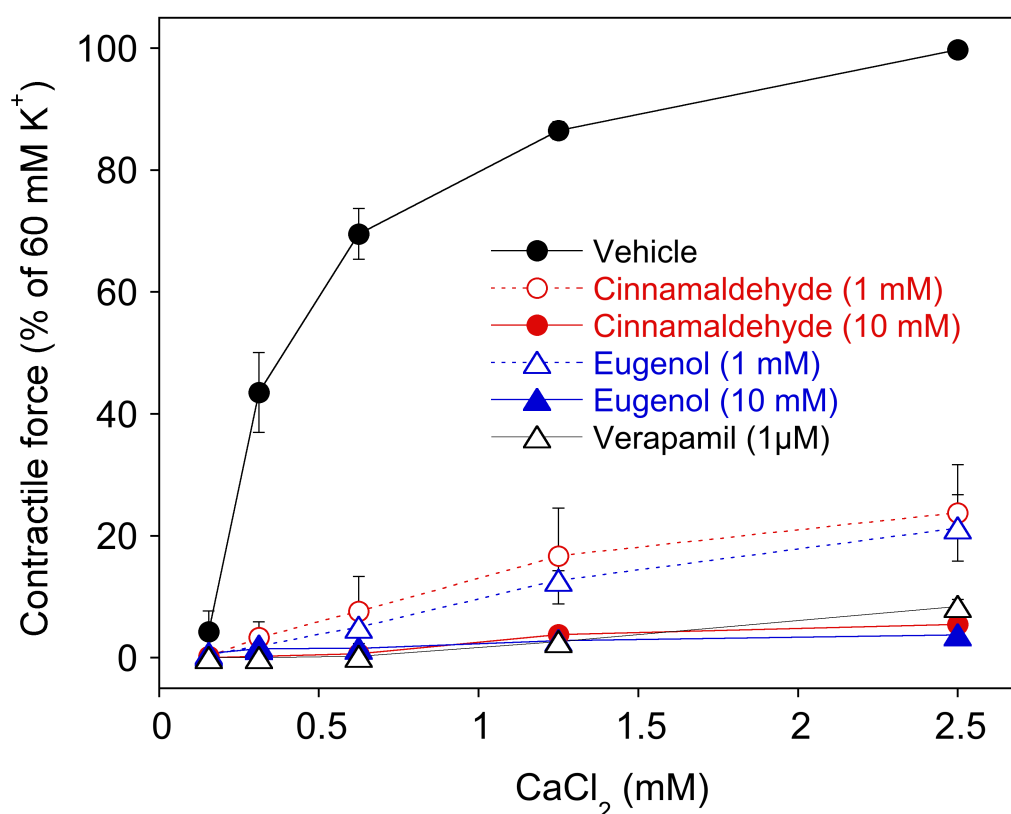

**S2 Fig. Effects of cinnamaldehyde and eugenol on CaCl<sub>2</sub>-induced contractile response in endothelium-denuded rat aortic rings.** Rings were treated with Ca<sup>2+</sup>-free high K<sup>+</sup> solution (containing 0.1 mM EGTA and 60 mM K<sup>+</sup>). The Ca<sup>2+</sup>-free preparations were then cumulatively contracted with CaCl<sub>2</sub> (0.156-2.5 mM) in the absence or presence of cinnamaldehyde or eugenol. The established L-type Ca<sup>2+</sup> channel blocker verapamil was used as reference compound. Data were normalized to contraction induced by 60 mM K<sup>+</sup> in the presence of 2.5 mM CaCl<sub>2</sub> (=100%). Concentration-response curves obtained with different ring segments from a single animal were averaged and counted as an individual experiment. Data are expressed as mean values±SEM (n=3). All compounds significantly inhibited CaCl<sub>2</sub>-induced contraction (p<0.05 determined by ANOVA and Dunnett's post hoc test).
