# Supplementary material for: Effects of flavoring compounds used in electronic cigarette refill liquids on endothelial and vascular function
Source: PLOS journal article supplement (doi:10.1371/journal.pone.0222152), 2019-09-09
Supplement: S8 (10.1371/journal.pone.0222152.s008) [file journal.pone.0222152.s008]

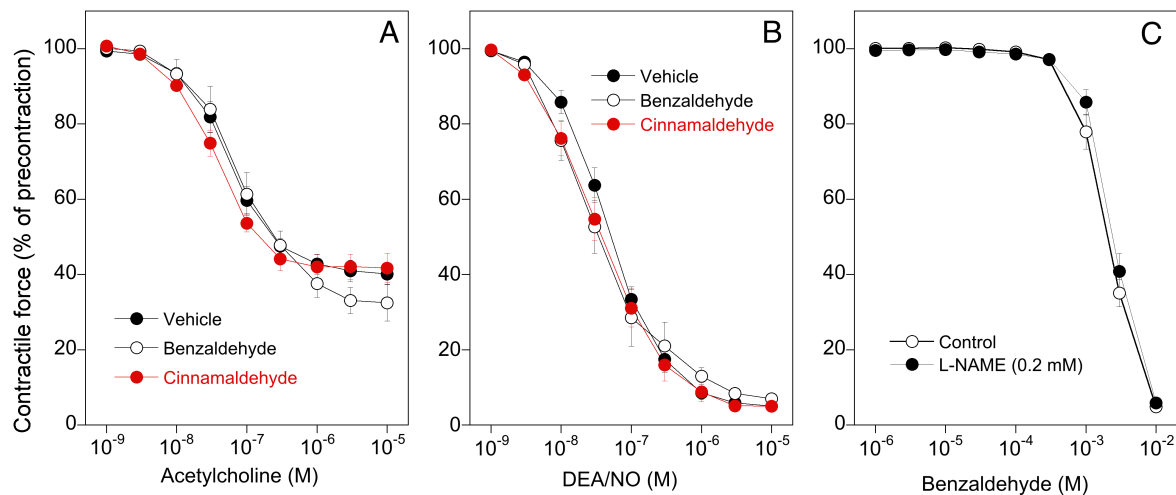

**S4 Fig. Effect of benzaldehyde, the major product of thermal degradation of cinnamaldehyde on relaxation of aortic rings to acetylcholine (A), DEA/NO (B) or vascular tone (C).** Benzaldehyde (300  $\mu$ M) neither affected acetylcholine ( $EC_{50}$ : 68 (11-439) nM;  $E_{max}$ :  $32 \pm 5.5\%$ ) nor DEA/NO ( $EC_{50}$ : 28 (6-125) nM,  $E_{max}$ :  $6 \pm 3.2\%$ ) - induced relaxation. Benzaldehyde relaxed precontracted vessels in the absence or presence of L-NAME with  $EC_{50}$  values of 2.2 (1.5-3.0) and 2.5 (1.9-3.3) mM, respectively ( $p=0.45$ , ANOVA). The vehicle and cinnamaldehyde data from Fig. 7 are shown for comparison. Concentration-response curves obtained with different ring segments from a single animal were averaged and counted as an individual experiment. Data are expressed as mean values  $\pm$  SEM ( $n=3$  (A, B) and 6 (C)).
